# Supplementary material for: Carbon coated 3D Nb2O5 hollow nanospheres with superior performance as an anode for high energy Li-ion capacitors
Source: Royal Society of Chemistry journal article supplement (doi:10.1039/d0se00804d), 2020-01-01
Supplement: d0se00804d1.pdf [file d0se00804d1.pdf]

## Supplementary Material

Carbon coated 3D Nb<sub>2</sub>O<sub>5</sub> hollow nanospheres with superior performance  
as the anode for high energy Li-ion capacitors

Haoran Li,<sup>‡a</sup> Dong Li,<sup>‡a</sup> Jing Shi,<sup>\*a</sup> Zeyin He,<sup>a</sup> Zongchen Zhao,<sup>a</sup> Huanlei Wang<sup>\*a</sup>

<sup>a</sup> School of Materials Science and Engineering, Ocean University of China, Qingdao  
266100, People's Republic of China

<sup>‡</sup> These authors contribute equally to this work.

\*Corresponding authors.

E-mail address: [shijing@ouc.edu.cn](mailto:shijing@ouc.edu.cn) (J. Shi); [huanleiwang@gmail.com](mailto:huanleiwang@gmail.com) (H. Wang).

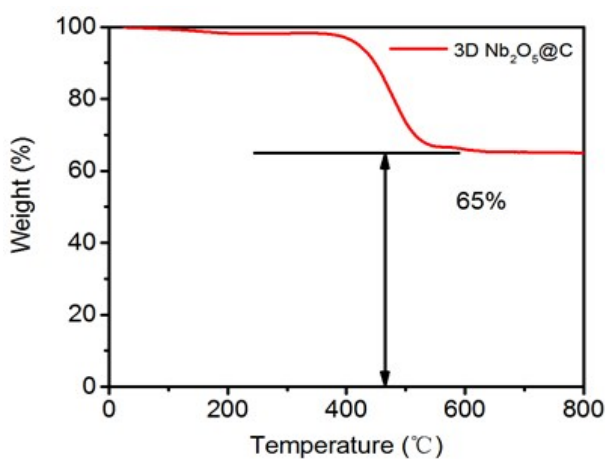

**Fig. S1** Thermogravimetric curves of 3D Nb<sub>2</sub>O<sub>5</sub>@C hollow nanosphere composite in air.

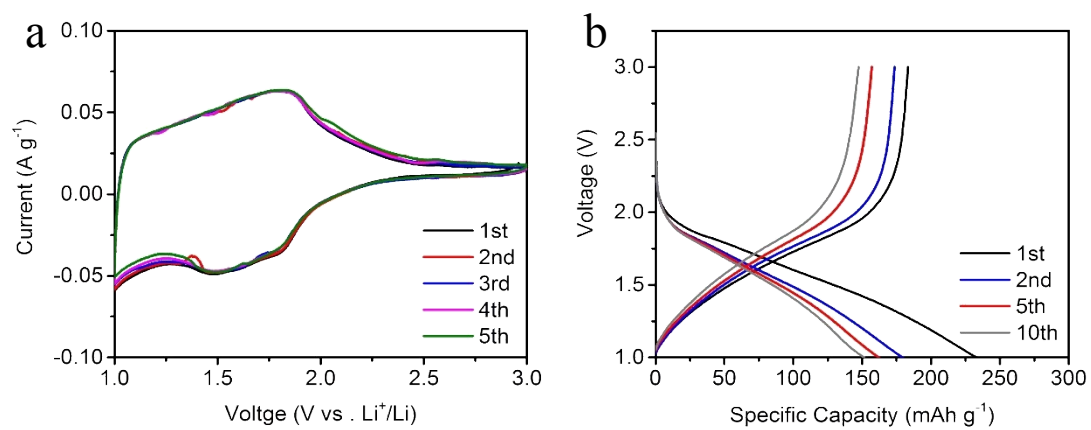

**Fig. S2** (a) CV curves of Nb<sub>2</sub>O<sub>5</sub> at 0.1 mV s<sup>-1</sup>. (b) Galvanostatic charge-discharge profiles of Nb<sub>2</sub>O<sub>5</sub> at 0.1 A g<sup>-1</sup>.

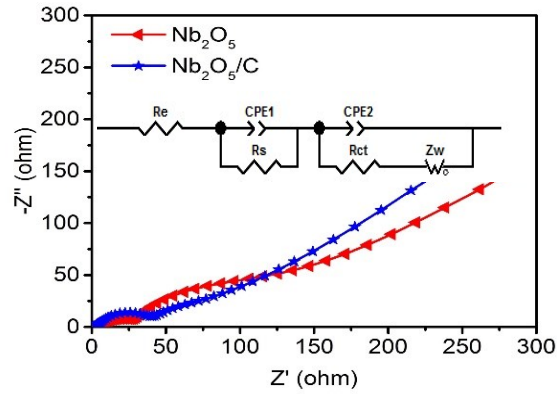

**Fig. S3** Nyquist plots of  $\text{Nb}_2\text{O}_5$  and 3D  $\text{Nb}_2\text{O}_5/\text{C}$  electrodes after 500 cycles and the corresponding equivalent circuit.

After 500 cycles, the impedance spectra are composed of three parts. The first semicircle is associated with the  $\text{Li}^+$  migration in the electrode surface. The second semicircle is related to the charge transfer. The sloping line is bound up with the  $\text{Li}^+$  diffusion. As shown in the corresponding equivalent circuits,  $R_e$  represents the ohmic resistance,  $R_{ct}$  is charge transfer resistance and  $W_s$  is the Warburg impedance

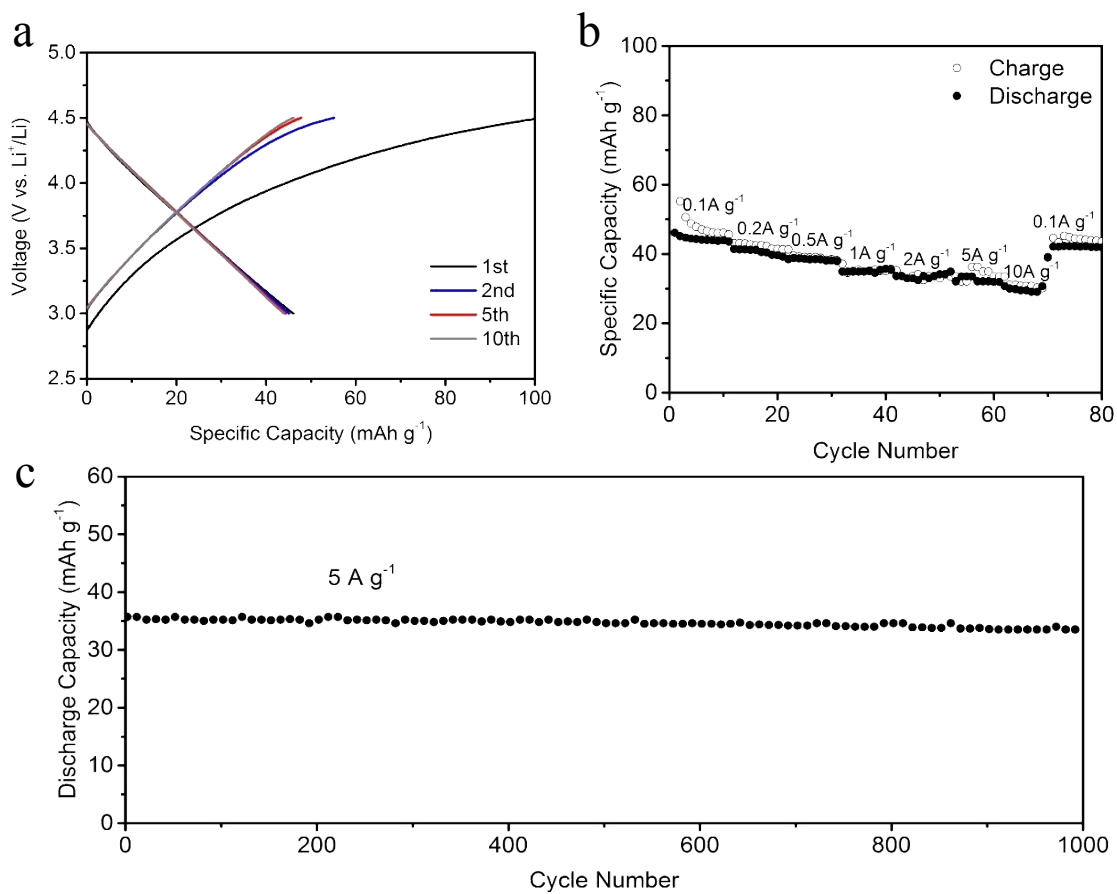

**Fig. S4** (a) Galvanostatic charge-discharge profiles of GCN at  $0.1 \text{ A g}^{-1}$ . (b) Rate capacities at various current densities from 0.1 to  $10 \text{ A g}^{-1}$ . (c) Cycling performance and the related coulombic efficiency for GCN at  $5 \text{ A g}^{-1}$  for 1000 cycle.

**Table S1** Comparison with the performance of previously reported Li-ion capacitors.

| Hybrid system                                                               | Voltage Window | Energy Density/<br>Power Density                                                                              | Cyclability                                       | Ref.         |
|-----------------------------------------------------------------------------|----------------|---------------------------------------------------------------------------------------------------------------|---------------------------------------------------|--------------|
| 3DNb <sub>2</sub> O <sub>5</sub> @C//G<br>CN (Li <sup>+</sup> )             | 0-3.5 V        | 96.8 Wh kg <sup>-1</sup> at 435.5 W kg <sup>-1</sup><br>12.6 Wh kg <sup>-1</sup> at 41000 W kg <sup>-1</sup>  | 75% after 3000 cycles<br>at 5A g <sup>-1</sup>    | This<br>work |
| CNT/Nb <sub>2</sub> O <sub>5</sub> //AC<br>(Li <sup>+</sup> )               | 0.5-3 V        | 33.5Wh kg <sup>-1</sup> at 83 W kg <sup>-1</sup><br>~4 Wh kg <sup>-1</sup> at 4000 W kg <sup>-1</sup>         | –                                                 | 1            |
| Nb <sub>2</sub> O <sub>5</sub> //AC<br>(Li <sup>+</sup> )                   | 1-3.5 V        | 95.55 Wh kg <sup>-1</sup> at 191 W kg <sup>-1</sup><br>65/39 Wh kg <sup>-1</sup> at 5350.9 W kg <sup>-1</sup> | –                                                 | 2            |
| CNT <sub>5</sub> -Nb <sub>2</sub> O <sub>5</sub> //AC<br>(Li <sup>+</sup> ) | 0.5-3 V        | ~50 Wh kg <sup>-1</sup> at 86.46 W kg <sup>-1</sup><br>14.77 Wh kg <sup>-1</sup> at 6753.5 W kg <sup>-1</sup> | –                                                 | 3            |
| T-Nb <sub>2</sub> O <sub>5</sub><br>/graphene//MC<br>(Li <sup>+</sup> )     | 0.8-3 V        | 48 Wh kg <sup>-1</sup> at 690 W kg <sup>-1</sup><br>13 Wh kg <sup>-1</sup> at 16000 W kg <sup>-1</sup>        | ~92% after 3000<br>cycles at 1A g <sup>-1</sup>   | 4            |
| m-Nb <sub>2</sub> O <sub>5</sub> -<br>C//MSP-20<br>(Li <sup>+</sup> )       | 0-3 V          | 20 Wh kg <sup>-1</sup> at 12137 W kg <sup>-1</sup><br>15 Wh kg <sup>-1</sup> at 18510 W kg <sup>-1</sup>      | 90% after 1000 cycles<br>at 1A g <sup>-1</sup>    | 5            |
| T-<br>Nb <sub>2</sub> O <sub>5</sub> @C//MSP-<br>20<br>(Li <sup>+</sup> )   | 1-3.5 V        | 63 Wh kg <sup>-1</sup> at 70 W kg <sup>-1</sup><br>5 Wh kg <sup>-1</sup> at 16528 W kg <sup>-1</sup>          | ~80% after 1000<br>cycles at 1A g <sup>-1</sup>   | 6            |
| MnO/C//CNS<br>(Li <sup>+</sup> )                                            | 1-4 V          | 100 Wh kg <sup>-1</sup> at 83 W kg <sup>-1</sup><br>30 Wh kg <sup>-1</sup> at 20000 W kg <sup>-1</sup>        | 70% after 5000 cycles<br>at 5A g <sup>-1</sup>    | 7            |
| MnO-C//AC<br>(Li <sup>+</sup> )                                             | 0-4 V          | 227 Wh kg <sup>-1</sup> at ~60 W kg <sup>-1</sup><br>~20 Wh kg <sup>-1</sup> at 2952 W kg <sup>-1</sup>       | 92.5% after 3500<br>cycles at 4 A g <sup>-1</sup> | 8            |
| TiO <sub>2</sub> //CNT-AC<br>(Li <sup>+</sup> )                             | 1-3 V          | 59.6 Wh kg <sup>-1</sup> at 120 W kg <sup>-1</sup><br>31.2 Wh kg <sup>-1</sup> at 7000 W kg <sup>-1</sup>     | –                                                 | 9            |

## References

- 1 X.L. Wang, G. Li, Z. Chen, V. Augustyn, G.Wang, B. Dunn, X. M. Ma, *Adv.Energy Mater.*, 2016, **1**, 1089-1093.
- 2 B. H. Deng, T. Y. Lei, W. H. Zhu, L. Xiao, and J. P. Liu, *Adv. Funct. Mater.*, **28**, 1704330.
- 3 X. Wang, G. Li, R. Tjandra, X. Fan X. Xiao, A. Yu Fast, *RSC Adv.*, 2015, **5**, 41179-41185.
- 4 L. Kong, C. Zhang, S. Zhang, J. Wang R. Cai, C. Lv, W. Qiao, L. Ling, D. Long, *J. Mater. Chem. A*, 2014, **2**, 17962-17970.
- 5 E. Lim, H. Kim, C. Jo, J. Chun, K. Ku, S. Kim, H.I. Lee, I.S. Nam, S. Yoon, K. Kang, J. Lee, *ACS Nano*, 2014, **8**, 8968-8978.
- 6 E. Lim, C. Jo, H. Kim, M.H. Kim, Y. Mun, J. Chun, Y. Ye, J. Hwang, K.S. Ha, K.C. Roh, K. Kang, S. Yun, J. Lee, *ACS Nano*, 2015, **9**, 7497-7505.
- 7 H. Kim, K.Y. Park, M.Y. Cho, M.H. Kim, J. Hong, S.K. Jung, K.C. Roh, K. Kang, *ChemElectroChem*, 2014, **1**, 125-130.
- 8 Y.M. Zhao, Y.P. Cui, J. Shi, W. Liu, H. L. Wang, *J. Mater. Chem. A*, 2017, **5**, 15243-15252.
- 9 C. Liu, C. Zhang, H. Song, C. Zhang, Y. Liu, X. Nan, G. Cao, *Nano Energy*, 2016, **22**, 290-300.
